# Supplementary material
Source: PubMed Central journal article supplement (PMC2730860)
Supplement: supp_91_9_2242__1.pdf [file supp_91_9_2242__1.pdf]

TABLE E-1 Study Characteristics

| First Author              | Journal                             | Year | Level of Evidence | Study Design              | Country       | No. of Surgeons | Procedure Date Range* | Determination of Treatment                | Independent Examiners | No. of Eligible Patients | No. of Patients with Follow-up | Duration of Follow-up† (mo) |
|---------------------------|-------------------------------------|------|-------------------|---------------------------|---------------|-----------------|-----------------------|-------------------------------------------|-----------------------|--------------------------|--------------------------------|-----------------------------|
| Barrett <sup>36</sup>     | Am J Sports Med                     | 2005 | III               | Retrospective comparative | United States | 1               | 1994 to 2000          | Patient choice                            | No                    | 63                       | 63                             | 41 (24 to 99)               |
| Chang <sup>37</sup>       | Arthroscopy                         | 2003 | III               | Retrospective comparative | United States | 1               | 1992 to 1995          | Patient choice                            | Yes                   | 89                       | 79                             | 37 (24 to 56)               |
| Edgar <sup>38</sup>       | Clin Orthop Relat Res               | 2008 | II                | Prospective comparative   | United States | 1               | 1997 to 2000          | Patient choice (25%), randomization (75%) | Yes                   | 104                      | 83                             | 50 (36 to 70)               |
| Gorschewsky <sup>39</sup> | Am J Sports Med                     | 2005 | II                | Prospective comparative   | Switzerland   | 2               | 1995 to 1998          | Chronological division                    | Yes                   | 268                      | 186                            | 71 (54 to 80)               |
| Harner <sup>40</sup>      | Clin Orthop Relat Res               | 1996 | III               | Retrospective comparative | United States | 2               | 1986 to 1989          | Patient choice and allograft availability | No                    | 244                      | 90                             | 45 (30 to 75)               |
| Kleipool <sup>41</sup>    | Knee Surg Sports Traumatol Arthrosc | 1998 | II                | Prospective comparative   | Netherlands   | 1               | 1989 to 1991          | Allograft availability                    | Yes                   | 68                       | 62                             | 49 (30 to 74)               |
| Peterson <sup>42</sup>    | Arthroscopy                         | 2001 | II                | Prospective comparative   | United States | 1               | 1991 to 1992          | Patient choice                            | No                    | 119                      | 60                             | 63 (55 to 78)               |
| Saddemi <sup>43</sup>     | Arthroscopy                         | 1993 | III               | Retrospective comparative | United States | 1               | 1988 to 1990          | Patient choice                            | No                    | 57                       | 50                             | 24                          |
| Victor <sup>44</sup>      | Int Orthop                          | 1997 | II                | Prospective comparative   | Belgium       | 1               | NR                    | Allograft availability                    | Yes                   | 73                       | 73                             | 24                          |
| Total                     |                                     |      |                   |                           |               |                 |                       |                                           |                       | 1085                     | 746                            | 49 (24 to 99)               |

\*NR = not reported. †The values are given as the mean, with the range in parentheses.

TABLE E-2 Surgical Technique\*

| First Author              | Autograft Technique       |                                         |                                   |                               | Allograft Technique                      |                                         |                                      |                               | Allograft Properties |                                                    |                                         |
|---------------------------|---------------------------|-----------------------------------------|-----------------------------------|-------------------------------|------------------------------------------|-----------------------------------------|--------------------------------------|-------------------------------|----------------------|----------------------------------------------------|-----------------------------------------|
|                           | Graft Type                | Approach                                | Femoral Fixation                  | Tibial Fixation               | Graft Type                               | Approach                                | Femoral Fixation                     | Tibial Fixation               | Donor Age (yr)       | Sterilization Method                               | Storage                                 |
| Barrett <sup>36</sup>     | Bone-patellar tendon-bone | Endoscopic                              | Interference screw or Endobutton  | Multiple                      | Bone-patellar tendon-bone                | Endoscopic                              | Interference screw and/or Endobutton | Multiple                      | NR                   | Non-irradiated                                     | Fresh frozen                            |
| Chang <sup>37</sup>       | Bone-patellar tendon-bone | Two-incision; iliotibial band tenodesis | Interference screw                | Interference screw            | Bone-patellar tendon-bone                | Two-incision; iliotibial band tenodesis | Interference screw                   | Interference screw            | NR                   | 30 non-irradiated<br>10 irradiated (dose unknown)† | Fresh frozen                            |
| Edgar <sup>38</sup>       | Hamstring (quadruple)     | Endoscopic                              | Endobutton and interference screw | Interference screw and washer | Hamstring (quadruple)                    | Endoscopic                              | Endobutton and interference screw    | Interference screw and washer | NR                   | Non-irradiated                                     | 20 cryopreservation,<br>27 fresh frozen |
| Gorschewsky <sup>39</sup> | Bone-patellar tendon-bone | Endoscopic                              | Interference screw                | Interference screw            | Bone-patellar tendon-bone                | Endoscopic                              | Interference screw                   | Interference screw            | NR                   | Acetone solvent drying; irradiation (1.5 Mrad)     | NR                                      |
| Harner <sup>40</sup>      | Bone-patellar tendon-bone | Two-incision                            | NR                                | NR                            | 60 bone-patellar tendon-bone, 4 Achilles | Two-incision                            | NR                                   | NR                            | NR                   | Non-irradiated                                     | Fresh frozen                            |
| Kleipool <sup>41</sup>    | Bone-patellar tendon-bone | Endoscopic                              | Interference screw                | Interference screw or staple  | Bone-patellar tendon-bone                | Endoscopic                              | Interference screw                   | Interference screw or staple  | <50                  | Non-irradiated                                     | Fresh frozen                            |
| Peterson <sup>42</sup>    | Bone-patellar tendon-bone | Endoscopic                              | Interference screw                | Interference screw            | Bone-patellar tendon-bone                | Endoscopic                              | Interference screw                   | Interference screw            | NR                   | Non-irradiated                                     | Fresh frozen                            |
| Saddemi <sup>43</sup>     | Bone-patellar tendon-bone | Two-incision                            | NR                                | NR                            | Bone-patellar tendon-bone                | Two-incision                            | NR                                   | NR                            | NR                   | Irradiated (2.0 Mrad)                              | Fresh frozen                            |
| Victor <sup>44</sup>      | Bone-patellar tendon-bone | Endoscopic                              | NR                                | NR                            | Bone-patellar tendon-bone                | Endoscopic                              | NR                                   | NR                            | <45                  | NR                                                 | NR                                      |

\*NR = not reported. †Data on allograft preparation were only available for forty of the forty-six cases.

TABLE E-3 Demographic Characteristics According to Graft Source\*

| First Author              | Autograft            |                    |                                                               |                      |                             |                                         | Allograft            |                    |                                                                |                      |                             |                                         |
|---------------------------|----------------------|--------------------|---------------------------------------------------------------|----------------------|-----------------------------|-----------------------------------------|----------------------|--------------------|----------------------------------------------------------------|----------------------|-----------------------------|-----------------------------------------|
|                           | Patient Age† (yr)    | Male: Female Ratio | Time from Injury to Reconstruction ‡                          | Sports Mechanism (%) | Duration of Follow-up† (mo) | Percentage of Patients at Follow-up (%) | Patient Age† (yr)    | Male: Female Ratio | Time from Injury to Reconstruction ‡                           | Sports Mechanism (%) | Duration of Follow-up† (mo) | Percentage of Patients at Follow-up (%) |
| Barrett <sup>36</sup>     | 45 (40 to 54)        | 15:10              | 28 (0.2 to 301)                                               | NR                   | <b>48 (24 to 99)</b>        | 100% (25 of 25)                         | 47 (40 to 58)        | 20:18              | 25 (0.3 to 319)                                                | NR                   | <b>36 (24 to 74)</b>        | 100% (38 of 38)                         |
| Chang <sup>37</sup>       | <b>29 (13 to 51)</b> | <b>19:14</b>       | 25 (0.5 to 196)                                               | 88% (29 of 33)       | <b>41 (34 to 47)</b>        | 89% (33 of 37)                          | <b>33 (16 to 52)</b> | <b>41:5</b>        | 18 (0.4 to 118)                                                | 91% (42 of 46)       | <b>34 (24 to 56)</b>        | 88% (46 of 52)                          |
| Edgar <sup>38</sup>       | 27                   | 20:17              | <12 wk (18 patients)<br>>12 wk (19 patients)                  | NR                   | 52 (38 to 70)               | 80% total (37 of NR)                    | 31                   | 26:20              | <12 wk (24 patients)<br>>12 wk (22 patients)                   | NR                   | 48 (36 to 64)               | 80% total (46 of NR)                    |
| Gorschewsky <sup>39</sup> | NR                   | NR                 | NR                                                            | NR                   | NR                          | 74% (101 of 136)                        | NR                   | NR                 | NR                                                             | NR                   | NR                          | 64% (85 of 132)                         |
| Harner <sup>40</sup>      | NR                   | 21:5               | <b>&lt;4 wk (1 patient)</b><br><b>&gt;4 wk (25 patients)</b>  | 85% (22 of 26)       | NR                          | 32% (26 of 82)                          | NR                   | 51:13              | <b>&lt;4 wk (52 patients)</b><br><b>&gt;4 wk (12 patients)</b> | 84% (54 of 64)       | NR                          | 40% (64 of 162)                         |
| Kleipool <sup>41</sup>    | 28 (16 to 38)        | 9:17               | 30 (1 to 128)                                                 | 96% (25 of 26)       | <b>52 (42 to 72)</b>        | 90% (26 of 29)                          | 28 (14 to 43)        | 17:19              | 55 (0.25 to 240)                                               | 97% (35 of 36)       | <b>46 (30 to 64)</b>        | 92% (36 of 39)                          |
| Peterson <sup>42</sup>    | 25 (15 to 43)        | 14:16              | <b>&lt;3 mo (21 patients)</b><br><b>&gt;3 mo (9 patients)</b> | 70% (21 of 30)       | 65 (57 to 78)               | 42% (30 of 71)                          | 28 (15 to 55)        | 19:11              | <b>&lt;3 mo (14 patients)</b><br><b>&gt;3 mo (16 patients)</b> | 83% (25 of 30)       | 63 (55 to 73)               | 63% (30 of 48)                          |
| Saddemi <sup>43</sup>     | 23                   | NR                 | <4 wk (9 patients)<br>>4 wk (22 patients)                     | NR                   | NR                          | 86% (31 of 36)                          | 21                   | NR                 | <4 wk (6 patients)<br>>4 wk (13 patients)                      | NR                   | NR                          | 90% (19 of 21)                          |
| Victor <sup>44</sup>      | NR                   | NR                 | NR                                                            | NR                   | 24                          | 100% (48 of 48)                         | NR                   | NR                 | NR                                                             | NR                   | 24                          | 100% (25 of 25)                         |

\*Significant differences ( $p < 0.05$ ) are shown in bold. NR = not reported. †The values are given as the mean, with the range in parentheses (when available). ‡Unless otherwise specified, the values are given as the mean (in months), with the range in parentheses.

TABLE E-4 Patient-Oriented Outcomes and Composite Scales\*

| First Author              | Symptom Scales |           |           |         | IKDC Final Rating |                |                |                   |                |                |                 |                   |         | Tegner      |           |         |
|---------------------------|----------------|-----------|-----------|---------|-------------------|----------------|----------------|-------------------|----------------|----------------|-----------------|-------------------|---------|-------------|-----------|---------|
|                           |                |           |           |         | Autograft         |                |                |                   | Allograft      |                |                 |                   |         |             |           |         |
|                           | Form           | Autograft | Allograft | P Value | Normal            | Near Normal    | Abnormal       | Severely Abnormal | Normal         | Near Normal    | Abnormal        | Severely Abnormal | P Value | Autograft   | Allograft | P Value |
| Barrett <sup>36</sup>     | Lysholm        | 92        | 91        | NS      | 48% (12 of 25)    | 48% (12 of 25) | 4% (1 of 25)   | 0% (0 of 25)      | 50% (19 of 38) | 37% (14 of 38) | 13% (5 of 38)   | 0% (0 of 38)      | 0.614   | 4.3         | 4.1       | NS      |
| Chang <sup>37</sup>       | Lysholm        | 96        | 94        | 0.25    | Not studied       |                |                |                   |                |                |                 |                   |         | Not studied |           |         |
| Edgar <sup>38</sup>       | Lysholm        | 91        | 93        | 0.75    | 32% (12 of 37)    | 51% (19 of 37) | 11% (4 of 37)  | 5% (2 of 37)      | 41% (19 of 46) | 41% (19 of 46) | 13% (6 of 46)   | 4% (2 of 46)      | NS      | 6.8         | 6.9       | NS      |
| Gorschewsky <sup>39</sup> | Lysholm        | 94        | 78        | 0.012   | 83% (84 of 101)   |                | 9% (9 of 101)† | 8% (8 of 101)†    | 36% (31 of 85) |                | 14% (12 of 85)† | 49% (42 of 85)†   | NR      | Not studied |           |         |
| Harner <sup>40</sup>      | Cincinnati     | 85        | 86        | NS      | 4% (1 of 26)      | 35% (9 of 26)  | 54% (14 of 26) | 8% (2 of 26)      | 5% (3 of 64)   | 44% (28 of 64) | 42% (27 of 64)  | 9% (6 of 64)      | NS      | Not studied |           |         |
| Kleipool <sup>41</sup>    | Lysholm        | 95        | 94        | NS      | 27% (7 of 26)     | 42% (11 of 26) | 31% (8 of 26)  | 0% (0 of 26)      | 47% (17 of 36) | 36% (13 of 36) | 14% (5 of 36)   | 3% (1 of 36)      | NS      | 6           | 5         | NS      |
| Peterson <sup>42</sup>    | Lysholm        | 89        | 90        | NS      | Not studied       |                |                |                   |                |                |                 |                   |         | 6.1         | 5.4       | NS      |
| Saddemi <sup>43</sup>     | Not studied    |           |           |         | Not studied       |                |                |                   |                |                |                 |                   |         | Not studied |           |         |
| Victor <sup>44</sup>      | Lysholm        | 93        | 85        | 0.27    | Not studied       |                |                |                   |                |                |                 |                   |         | 4.8         | 4.4       | 0.5     |

\*IKDC = International Knee Documentation Committee, NR = not reported, NS = not significant. †Estimated from graphical depiction.

TABLE E-5 Physical Examination—Laxity\*

| First Author              | Lachman                    |                        |                  |              |                           |                       |                  |              |              | Pivot Shift                 |                         |                 |              |                            |                        |                 |              |              |
|---------------------------|----------------------------|------------------------|------------------|--------------|---------------------------|-----------------------|------------------|--------------|--------------|-----------------------------|-------------------------|-----------------|--------------|----------------------------|------------------------|-----------------|--------------|--------------|
|                           | Autograft                  |                        |                  |              | Allograft                 |                       |                  |              | P Value      | Autograft                   |                         |                 |              | Allograft                  |                        |                 |              | P Value      |
|                           | 0                          | 1                      | 2                | 3            | 0                         | 1                     | 2                | 3            |              | 0                           | 1                       | 2               | 3            | 0                          | 1                      | 2               | 3            |              |
| Barrett <sup>36</sup>     | 96%<br>(24 of 25)          | 4% (1 of 25)           | 0% (0 of 25)     | —            | 82%<br>(31 of 38)         | 16%<br>(6 of 38)      | 3% (1 of 38)     | —            | 0.096        | 100%<br>(25 of 25)          | 0% (0 of 25)            | 0% (0 of 25)    | 0% (0 of 25) | 89%<br>(34 of 38)          | 8% (3 of 38)           | 3% (1 of 38)    | 0% (0 of 38) | 0.245        |
| Chang <sup>37,†</sup>     | 82%<br>(23 of 28)          | 18%<br>(5 of 28)       | 0% (0 of 28)     | 0% (0 of 28) | 68%<br>(26 of 38)         | 32%<br>(12 of 38)     | 0% (0 of 38)     | 0% (0 of 38) | 0.2          | 100%<br>(28 of 28)          | 0% (0 of 28)            | 0% (0 of 28)    | 0% (0 of 28) | 95%<br>(36 of 38)          | 5% (2 of 38)           | 0% (0 of 38)    | 0% (0 of 38) | 0.2          |
| Edgar <sup>38</sup>       | Not studied                |                        |                  |              |                           |                       |                  |              |              | Not studied                 |                         |                 |              |                            |                        |                 |              |              |
| Gorschewsky <sup>39</sup> | <b>76%<br/>(77 of 101)</b> | <b>24% (24 of 101)</b> |                  |              | <b>25%<br/>(21 of 85)</b> | <b>75% (64 of 85)</b> |                  |              | <b>0.024</b> | <b>84%<br/>(85 of 101)‡</b> | <b>16% (16 of 101)‡</b> |                 |              | <b>36%<br/>(31 of 85)‡</b> | <b>64% (54 of 85)‡</b> |                 |              | <b>0.013</b> |
| Harner <sup>40</sup>      | NR                         | NR                     | NR               | NR           | NR                        | NR                    | NR               | NR           | NS           | 92% (24 of 26)              |                         | 8% (2 of 26)    |              | 89% (57 of 64)             |                        | 11% (7 of 64)   |              | NS           |
| Kleipool <sup>41</sup>    | 65%<br>(17 of 26)          | 19%<br>(5 of 26)       | 15%<br>(4 of 26) | 0% (0 of 26) | 58%<br>(21 of 36)         | 28%<br>(10 of 36)     | 14%<br>(5 of 36) | 0% (0 of 36) | NS           | 73% (19 of 26)              | 23%<br>(6 of 26)        | 4%<br>(1 of 26) | 0% (0 of 26) | 78%<br>(28 of 36)          | 14%<br>(5 of 36)       | 8%<br>(3 of 36) | 0% (0 of 36) | NS           |
| Peterson <sup>42</sup>    | 77%<br>(23 of 30)          | 20%<br>(6 of 30)       | 3% (1 of 30)     | —            | 80%<br>(24 of 30)         | 10%<br>(3 of 30)      | 10%<br>(3 of 30) | —            | NS           | 90% (27 of 30)              | 7% (2 of 30)            | 3%<br>(1 of 30) | —            | 83%<br>(25 of 30)          | 13%<br>(4 of 30)       | 3%<br>(1 of 30) | —            | NS           |
| Saddemi <sup>43</sup>     | NR                         | NR                     | NR               | NR           | NR                        | NR                    | NR               | NR           | NS           | NR                          | NR                      | NR              | NR           | NR                         | NR                     | NR              | NR           | NS           |
| Victor <sup>44</sup>      | Not studied                |                        |                  |              |                           |                       |                  |              |              | Not studied                 |                         |                 |              |                            |                        |                 |              |              |

\*Significant differences (p < 0.05) are shown in bold. NR = not reported, NS = not significant. †Excludes the three patients in the allograft group with postoperative traumatic ruptures as well as five patients in the autograft group and five patients in the allograft group who did not return to clinic for final examination. ‡Estimated from graphical depiction.

TABLE E-6 Physical Examination—Other\*

| First Author              | Extension Deficit ( <i>deg</i> ) |             |              | Flexion Deficit ( <i>deg</i> ) |             |         | One-Leg Hop Test ( <i>percentage of knees with &gt;90% of value for contralateral side</i> ) |                       |                  | Thigh Circumference Difference ( <i>cm</i> ) |           |         |
|---------------------------|----------------------------------|-------------|--------------|--------------------------------|-------------|---------|----------------------------------------------------------------------------------------------|-----------------------|------------------|----------------------------------------------|-----------|---------|
|                           | Autograft                        | Allograft   | P Value      | Autograft                      | Allograft   | P Value | Autograft                                                                                    | Allograft             | P Value          | Autograft                                    | Allograft | P Value |
| Barrett <sup>36</sup>     | 0.4                              | 0.4         | 0.915        | 3.4                            | 3.8         | 0.756   | Not studied                                                                                  |                       |                  | 0.74                                         | 0.23      | 0.381   |
| Chang <sup>37</sup>       | 0                                | 0.6         | 0.2          | 1.8                            | 4.7         | 0.07    | Not studied                                                                                  |                       |                  | 0.4                                          | 0.3       | 0.7     |
| Edgar <sup>38</sup>       | Not studied                      |             |              | Not studied                    |             |         | Not studied                                                                                  |                       |                  | Not studied                                  |           |         |
| Gorschewsky <sup>39</sup> | Categorized                      | Categorized | NS           | Categorized                    | Categorized | NS      | <b>79% (80 of 101)</b>                                                                       | <b>36% (31 of 85)</b> | <b>&lt;0.001</b> | Not studied                                  |           |         |
| Harner <sup>40</sup>      | <b>3.0</b>                       | <b>1.2</b>  | <b>0.05</b>  | NR                             | NR          | NS      | 88% (23 of 26)                                                                               | 75% (48 of 64)        | NR               | Not studied                                  |           |         |
| Kleipool <sup>41</sup>    | Cat                              | cat         | NS           | cat                            | cat         | NS      | 96% (25 of 26)                                                                               | 92% (33 of 36)        | NS               | 0.27                                         | 0.22      | NS      |
| Peterson <sup>42</sup>    | <b>2.5</b>                       | <b>1.1</b>  | <b>0.027</b> | 0.5                            | 0.8         | NS      | Not studied                                                                                  |                       |                  | Not studied                                  |           |         |
| Saddemi <sup>43</sup>     | NR                               | NR          | NS           | NR                             | NR          | NS      | Not studied                                                                                  |                       |                  | 0.4†                                         | 0.4†      | NS      |
| Victor <sup>44</sup>      | Not studied                      |             |              | Not studied                    |             |         | NR                                                                                           | NR                    | 0.41             | NR                                           | NR        | NS      |

\*Significant differences ( $p < 0.05$ ) are shown in bold. NR = not reported, NS = not significant. †Estimated from graphical depiction.

TABLE E-7 Instrumented Laxity Measurements\*

| First Author              | Instrument            | Force          | Mean R/L diff (mm) |              |              | Grouped Frequency Distribution |                |               |                 |                |               |         |
|---------------------------|-----------------------|----------------|--------------------|--------------|--------------|--------------------------------|----------------|---------------|-----------------|----------------|---------------|---------|
|                           |                       |                | Autograft          | Allograft    | P Value      | Autograft                      |                |               | Allograft       |                |               | P Value |
|                           |                       |                |                    |              |              | <3 mm                          | 3 to 5 mm      | >5 mm         | <3 mm           | 3 to 5 mm      | >5 mm         |         |
| Barrett <sup>36</sup>     | KT-1000               | Maximum manual | 0.1                | 1.5          | 0.398        | 96% (24 of 25)                 | 4% (1 of 25)   | 0% (0 of 25)  | 87% (33 of 38)  | 5% (2 of 38)   | 8% (3 of 38)  | NS      |
| Chang <sup>37</sup> †     | KT-1000               | Maximum manual | 1.1                | 1.2          | 0.9          | 86% (19 of 22)                 | 5% (1 of 22)   | 9% (2 of 22)  | 82% (28 of 34)  | 9% (3 of 34)   | 9% (3 of 34)  | 0.7     |
| Edgar <sup>38</sup>       | KT-1000               | Maximum manual | 1.6                | 1.4          | NS           | 86% (32 of 37)                 | 5% (2 of 37)   | 8% (3 of 37)  | 87% (40 of 46)  | 11% (5 of 46)  | 2% (1 of 46)  | 0.33    |
| Gorschewsky <sup>39</sup> | KT-1000               | Maximum manual | <b>2.4 ‡</b>       | <b>4.9 ‡</b> | <b>0.027</b> | NR                             | NR             | NR            | NR              | NR             | NR            | NR      |
| Harner <sup>40</sup>      | KT-1000               | 30 lb          | 1.9                | 1.8          | NS           | 92% (24 of 26)                 |                | 8% (2 of 26)  | 94% (60 of 64)  |                | 6% (4 of 64)  | NS      |
| Kleipool <sup>41</sup>    | KT-1000               | NR             | NR                 | NR           | NR           | 69% (18 of 26)                 | 23% (6 of 26)  | 8% (2 of 26)  | 75% (27 of 36)  | 19% (7 of 36)  | 6% (2 of 36)  | NS      |
| Peterson <sup>42</sup>    | KT-1000               | NR             | NR                 | NR           | NR           | 67% (20 of 30)                 | 27% (8 of 30)  | 7% (2 of 30)  | 73% (22 of 30)  | 27% (8 of 30)  | 0% (0 of 30)  | NS      |
| Saddemi <sup>43</sup> §   | Knee Signature System | 40 lb          | 0.2                | 0.3          | NS           | 80% (20 of 25)#                | 20% (5 of 25)# | 0% (0 of 25)# | 83% (15 of 18)# | 11% (2 of 18)# | 6% (1 of 18)# | NS      |
| Victor <sup>44</sup>      | KT-1000               | 20 lb          | 7.4**              | 8.3**        | NS           | NR                             | NR             | NR            | NR              | NR             | NR            | NR      |

\*Significant differences ( $p < 0.05$ ) are shown in bold. NR = not reported, NS = not significant. †Excludes three patients in the allograft group with postoperative traumatic ruptures as well as five patients in the autograft group and five patients in the allograft group who did not return to clinic for final examination. Also excludes six patients in the autograft group and four patients in the allograft group with contralateral anterior cruciate ligament injuries. ‡Excludes ruptured transplants. §Excludes six patients in the autograft group and one patient in the allograft group with contralateral anterior cruciate ligament injuries. #Estimated from graphical depiction. \*\*Values for the operatively treated knee are provided because differences between the operatively and nonoperatively treated knees were not available.

TABLE E-8 Complications\*

| First Author              | Donor-Site Symptoms           |                        |                     |              | Deep Infections |              |         | Arthrofibrosis |                |         | Reoperation rate |                |         | Failures             |                       |              |
|---------------------------|-------------------------------|------------------------|---------------------|--------------|-----------------|--------------|---------|----------------|----------------|---------|------------------|----------------|---------|----------------------|-----------------------|--------------|
|                           | Symptom                       | Autograft              | Allograft           | P Value      | Autograft       | Allograft    | P Value | Autograft      | Allograft      | P Value | Autograft        | Allograft      | P Value | Autograft            | Allograft             | P Value      |
| Barrett <sup>36</sup>     | Anterior knee pain            | 4% (1 of 25)           | 0% (0 of 38)        | NS           | 0% (0 of 25)    | 0% (0 of 38) | NS      | NR             |                |         | NR               |                |         | 0% (0 of 25)         | 3% (1 of 38)          | NS           |
| Chang <sup>37</sup>       | Retropatellar pain            | 9% (3 of 33)           | 16% (7 of 43)†      | 0.4          | NR              |              |         | 4% (1 of 28)‡  | 11% (4 of 38)‡ | 0.3     | 0% (0 of 33)     | 4% (2 of 46)   | NR      | 0% (0 of 33)         | 7% (3 of 46)          | 0.1          |
| Edgar <sup>38</sup>       | Not studied                   |                        |                     |              | 0% (0 of 37)    | 0% (0 of 46) | NS      | 0% (0 of 37)   | 0% (0 of 46)   | NS      | NR               |                |         | 8% (3 of 37)         | 4% (2 of 46)          | NS           |
| Gorschewsky <sup>39</sup> | Kneeling pain or paresthesias | <b>50% (50 of 101)</b> | <b>0% (0 of 85)</b> | <b>0.014</b> | NR              |              |         | NR             |                |         | NR               |                |         | <b>6% (6 of 101)</b> | <b>45% (38 of 85)</b> | <b>0.005</b> |
| Harner <sup>40</sup>      | NR                            |                        |                     |              | NR              |              |         | NR             |                |         | NR               |                |         | NR                   |                       |              |
| Kleipool <sup>41</sup>    | Anterior knee pain            | 50% (13 of 26)         | 53% (19 of 36)      | NS           | NR              |              |         | NR             |                |         | 31% (8 of 26)    | 36% (13 of 36) | NS      | 0% (0 of 26)         | 0% (0 of 36)          | NS           |
| Peterson <sup>42</sup>    | Incision site complaints      | 53% (16 of 30)         | 7% (2 of 30)        | NR           | 0% (0 of 30)    | 0% (0 of 30) | NS      | 0% (0 of 30)   | 0% (0 of 30)   | NS      | NR               |                |         | 3% (1 of 30)         | 3% (1 of 30)          | NS           |
| Saddemi <sup>43</sup>     | Patellofemoral pain           | NR                     | NR                  | NS           | 0% (0 of 31)    | 0% (0 of 19) | NS      | 6% (2 of 31)   | 0% (0 of 19)   | NS      | 16% (5 of 31)    | 26% (5 of 19)  | NS      | 3% (1 of 31)         | 5% (1 of 19)          | NS           |
| Victor <sup>44</sup>      | Anterior knee pain            | 42% (20 of 48)         | 40% (10 of 25)      | NS           | NR              |              |         | NR             |                |         | NR               |                |         | 0% (0 of 48)         | 12% (3 of 25)         | NR           |

\*Significant differences ( $p < 0.05$ ) are shown in bold. NR = not reported, NS = not significant. †Excludes three patients in the allograft group with postoperative traumatic ruptures. ‡Excludes three patients in the allograft group with postoperative traumatic ruptures as well as five patients in the autograft group and five patients in the allograft group who did not return to clinic for final examination.



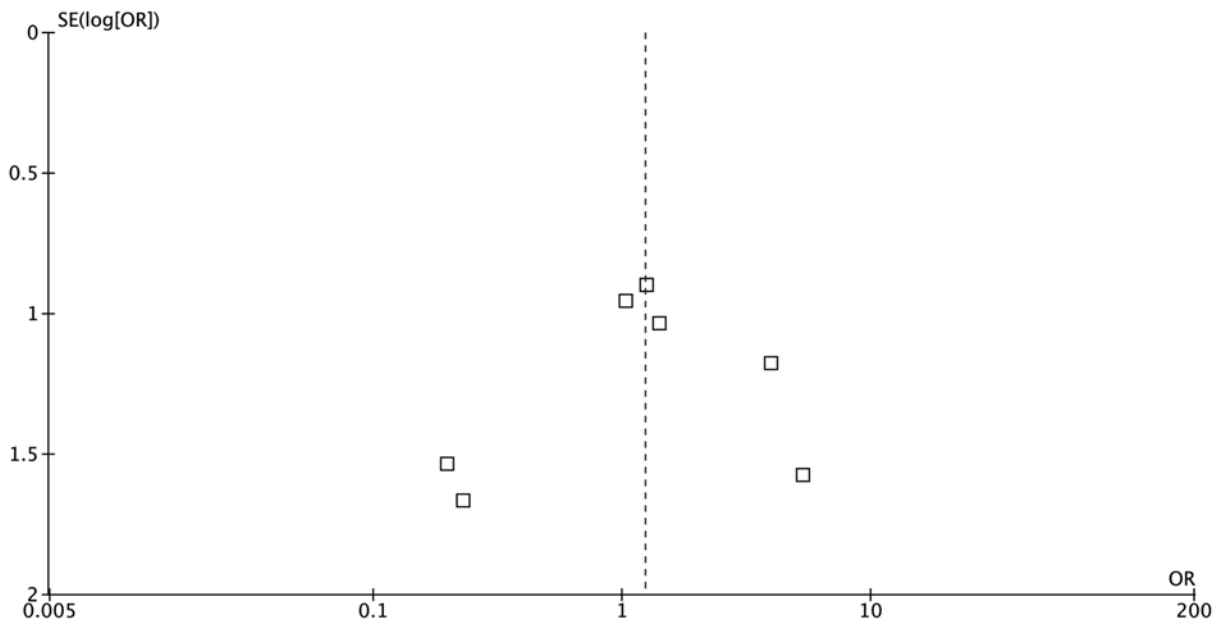

**Fig. E-1**  
 Funnel plot of instrumented laxity of >5 mm, which visually represents the standard error of the log odds ratio (a measure of precision) as a function of the odds ratio (a measure of the treatment effect). This funnel plot appears essentially symmetrical about the pooled estimate from the meta-analysis and is shaped like an inverted funnel, indicating no gross publication bias. SE (log [OR]) = standard error of the log odds ratio, and OR = odds ratio.

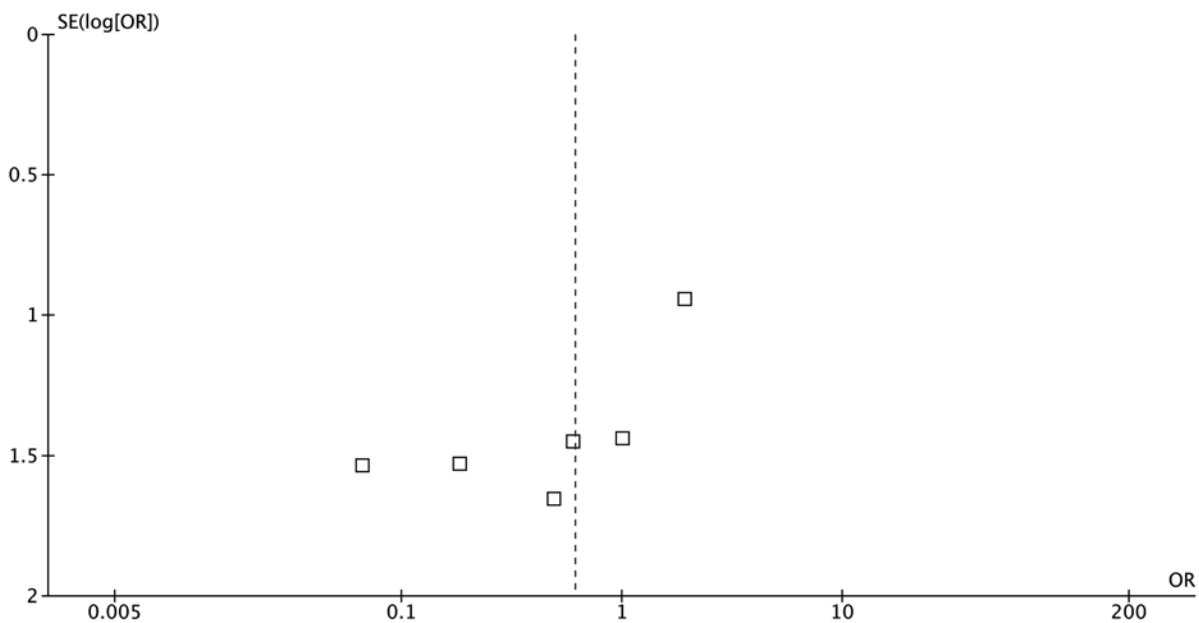

**Fig. E-2**  
 Funnel plot of clinical failures. This funnel plot appears somewhat asymmetrical about the pooled estimate from the meta-analysis and does not have the characteristic inverted funnel shape, reflecting the very low number of events and also possibly reflecting a publication bias against small studies that favor allograft success. SE (log [OR]) = standard error of the log odds ratio, and OR = odds ratio.
